# Supplementary material for: How do patients enter the healthcare system after the first onset of multiple sclerosis symptoms? The influence of setting and physician specialty on speed of diagnosis
Source: PubMed Central journal article supplement — Mult Scler. 2019 Jan 18;26(4):489–500. doi: 10.1177/1352458518823955 (PMC7140343; doi:10.1177/1352458518823955), 2019-01-18

SUPPLEMENTARY MATERIALS

Figure S1. Sample selection procedure.

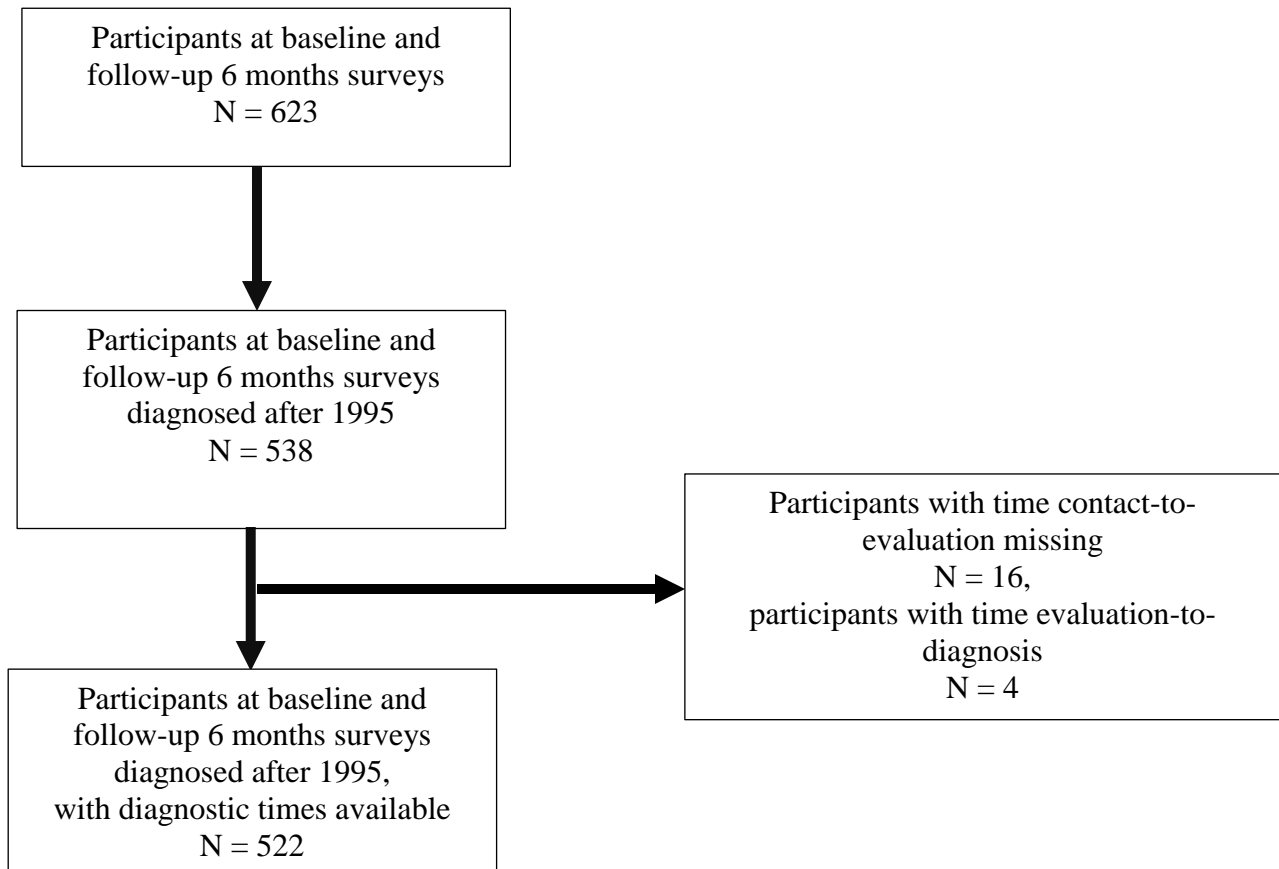

**Figure S2.** Decision tree, from contact of a doctor because of symptoms, until the decisions on the clarification tests are taken. Sample: N = 223 (regression analysis sample diagnosed in 2011-2018). Action missing in 4 (1.8%) participants. L = lead the tests, R = refer to other medical doctor, N = no action.

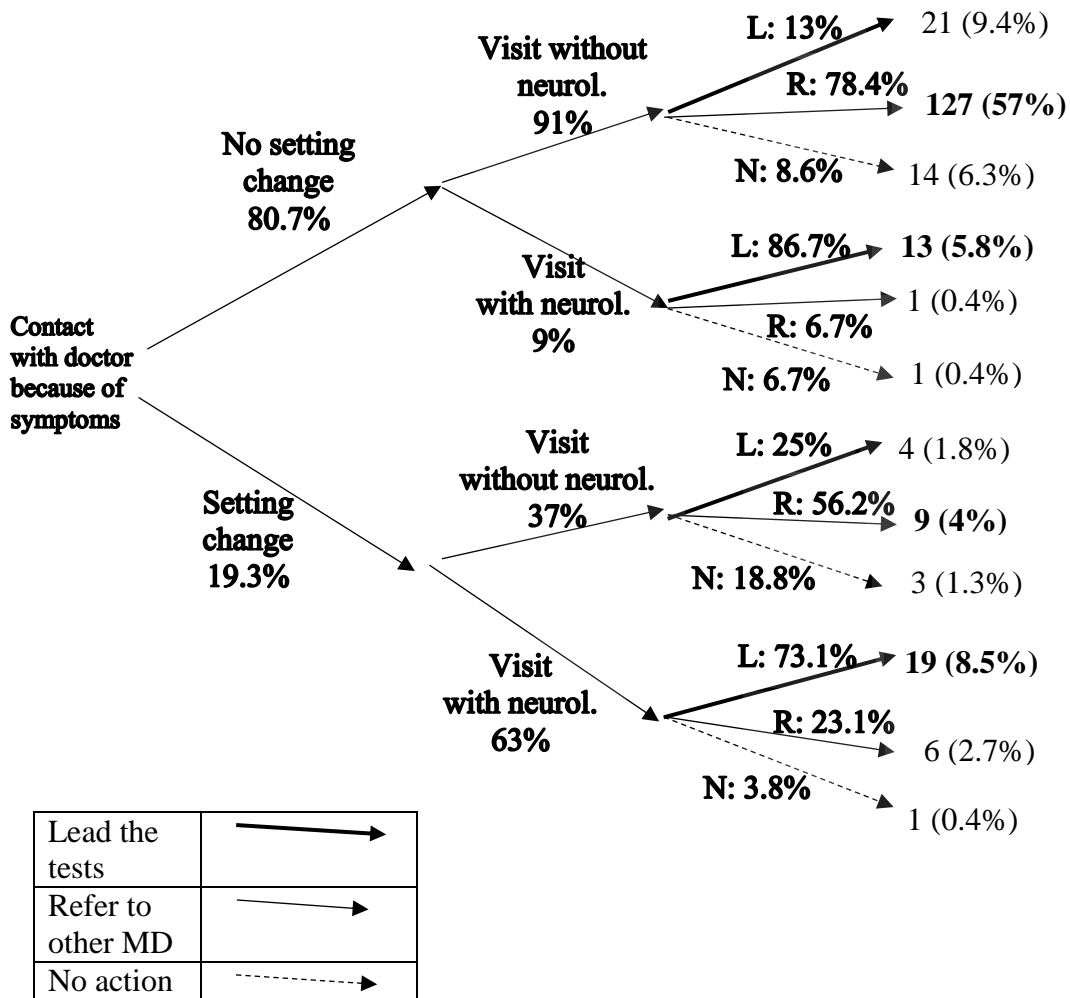

Numbers in bold, at the right side of the figure, are the most frequent action for each node.

**Table S1.** Descriptive table of the first diagnostic process steps.

| Physician contacted    | Physician visited  | Where the first visit took place (ER included into Hospital) | Number of repetitions among all follow-up 6-months survey (N = 623) | Number of repetitions among participants in the regression sample (N = 522) |
|------------------------|--------------------|--------------------------------------------------------------|---------------------------------------------------------------------|-----------------------------------------------------------------------------|
| <b>GP</b>              | <b>GP</b>          | <b>Private practice</b>                                      | 252                                                                 | 226                                                                         |
| <b>GP</b>              | <b>GP</b>          | <b>Hospital</b>                                              | 67                                                                  | 58                                                                          |
| <b>GP</b>              | <b>Neurologist</b> | <b>Private practice</b>                                      | 39                                                                  | 34                                                                          |
| <b>Neurologist</b>     | <b>Neurologist</b> | <b>Private practice</b>                                      | 36                                                                  | 22                                                                          |
| <b>Ophthalmologist</b> | <b>Specialist</b>  | <b>Private practice</b>                                      | 33                                                                  | 28                                                                          |
| <b>GP</b>              | <b>Neurologist</b> | <b>Hospital</b>                                              | 23                                                                  | 15                                                                          |
| <b>Ophthalmologist</b> | <b>Specialist</b>  | <b>Hospital</b>                                              | 22                                                                  | 20                                                                          |
| <b>Neurologist</b>     | <b>Neurologist</b> | <b>Hospital</b>                                              | 21                                                                  | 14                                                                          |
| <b>Ophthalmologist</b> | <b>Neurologist</b> | <b>Hospital</b>                                              | 15                                                                  | 12                                                                          |
| <b>GP</b>              | <b>Specialist</b>  | <b>Hospital</b>                                              | 14                                                                  | 11                                                                          |
| <b>ER</b>              | <b>Neurologist</b> | <b>Hospital</b>                                              | 12                                                                  | 10                                                                          |
| <b>ER</b>              | <b>Specialist</b>  | <b>Hospital</b>                                              | 12                                                                  | 10                                                                          |
| <b>ER</b>              | <b>GP</b>          | <b>Hospital</b>                                              | 11                                                                  | 10                                                                          |
| Other Specialist       | Specialist         | Private practice                                             | 8                                                                   | 6                                                                           |
| GP                     | Specialist         | Private practice                                             | 8                                                                   | 8                                                                           |
| Ophthalmologist        | Neurologist        | Private practice                                             | 7                                                                   | 6                                                                           |
| Other Specialist       | Neurologist        | Private practice                                             | 5                                                                   | 5                                                                           |
| Other Specialist       | Specialist         | Hospital                                                     | 5                                                                   | 3                                                                           |
| Neurologist            | GP                 | Private practice                                             | 4                                                                   | 4                                                                           |
| Other Specialist       | Neurologist        | Hospital                                                     | 4                                                                   | 4                                                                           |
| Other Specialist       | GP                 | Private practice                                             | 4                                                                   | 3                                                                           |
| ER                     | Neurologist        | Private practice                                             | 3                                                                   | 2                                                                           |
| Neurologist            | Specialist         | Private practice                                             | 3                                                                   | 3                                                                           |
| Other Specialist       | GP                 | Hospital                                                     | 3                                                                   | 3                                                                           |
| Ophthalmologist        | GP                 | Private practice                                             | 2                                                                   | 2                                                                           |
| Neurologist            | GP                 | Hospital                                                     | 2                                                                   | 1                                                                           |
| ER                     | GP                 | Private practice                                             | 1                                                                   | 1                                                                           |
| ER                     | Specialist         | Private practice                                             | 1                                                                   | 1                                                                           |
| Neurologist            | Specialist         | Hospital                                                     | 1                                                                   | 0                                                                           |

ER= Emergency room, GP= general practitioner.

The rows written in bold constitute together the 90% of all different pathways.

**Table S2.** Frequency of appearance as first symptoms for a list of 20 MS-specific symptoms.

| Symptom             | All participants completing follow-up 6 months (N = 623) | Participants included in the regression sample (N = 522) |
|---------------------|----------------------------------------------------------|----------------------------------------------------------|
| Gait p.             | 194 (31.1%)                                              | 164 (31.4%)                                              |
| Visual p.           | 230 (36.9%)                                              | 184 (35.2%)                                              |
| Bladder dysf.       | 69 (11.1%)                                               | 58 (11.1%)                                               |
| Balance p.          | 169 (27.1%)                                              | 142 (27.2%)                                              |
| Bowel dysf.         | 47 (7.5%)                                                | 38 (7.3%)                                                |
| Epileptic seizures* | 9 (1.4%)                                                 | 7 (1.3%)                                                 |
| Dizziness           | 123 (19.7%)                                              | 108 (20.7%)                                              |
| Dysarthria          | 38 (6.1%)                                                | 29 (5.6%)                                                |
| Paresthesia         | 377 (60.5%)                                              | 316 (60.5%)                                              |
| Dysphagia*          | 15 (2.4%)                                                | 11 (2.1%)                                                |
| Weakness            | 178 (28.6%)                                              | 152 (29.1%)                                              |
| Paralysis           | 159 (25.5%)                                              | 133 (25.5%)                                              |
| Fatigue             | 201 (32.3%)                                              | 174 (33.3%)                                              |
| Pain                | 78 (12.5%)                                               | 66 (12.6%)                                               |
| Spasticity          | 57 (9.1%)                                                | 47 (9%)                                                  |
| Tics*               | 26 (4.2%)                                                | 23 (4.4%)                                                |
| Tremor*             | 35 (5.6%)                                                | 25 (4.8%)                                                |
| Sexual dysf.        | 38 (6.1%)                                                | 35 (6.7%)                                                |
| Memory p.           | 48 (7.7%)                                                | 43 (8.2%)                                                |
| Depression          | 64 (10.3%)                                               | 53 (10.2%)                                               |

p. = problems, dysf. = dysfunction.

\*Symptom excluded from the variable selection for both the regression models, as occurring in less than 5% of the population of the regression sample.

**Table S3.** Features of participants with a RRMS start compared with those with PPMS.

|                              |                                                              | <b>RRMS start</b> | <b>PPMS</b> |
|------------------------------|--------------------------------------------------------------|-------------------|-------------|
| N                            |                                                              | 438               | 51          |
| Diagnosis time period        | 1996 to 2000                                                 | 66 (15.1%)        | 9 (17.6%)   |
|                              | 2001 to 2010                                                 | 183 (41.8%)       | 25 (49%)    |
|                              | After 2010                                                   | 189 (43.2%)       | 17 (33.3%)  |
| Age at onset                 | (20,30]                                                      | 152 (34.7%)       | 0 (0%)      |
|                              | (5,20]                                                       | 27 (6.2%)         | 3 (5.9%)    |
|                              | (30,40]                                                      | 131 (29.9%)       | 16 (31.4%)  |
|                              | (40,50]                                                      | 97 (22.1%)        | 18 (35.3%)  |
|                              | (50,70]                                                      | 15 (3.4%)         | 10 (19.6%)  |
|                              | NA                                                           | 16 (3.7%)         | 4 (7.8%)    |
| Sex                          | female                                                       | 330 (75.3%)       | 29 (56.9%)  |
|                              | male                                                         | 108 (24.7%)       | 22 (43.1%)  |
| Decision tree, first 2 steps | No setting change, first visit w/o neurologist               | 309 (70.5%)       | 30 (58.8%)  |
|                              | No setting change, first visit with neurologist              | 38 (8.7%)         | 5 (9.8%)    |
|                              | Setting change, first visit w/o neurologist                  | 31 (7.1%)         | 3 (5.9%)    |
|                              | Setting change, first visit with neurologist                 | 60 (13.7%)        | 13 (25.5%)  |
| Decision tree, last 2 steps  | First visit w/o neurologist, no action                       | 30 (6.8%)         | 1 (2%)      |
|                              | First visit w/o neurologist, refer to other MD               | 256 (58.4%)       | 24 (47.1%)  |
|                              | First visit w/o neurologist, lead the tests                  | 52 (11.9%)        | 7 (13.7%)   |
|                              | First visit with neurologist, no action or refer to other MD | 27 (6.2%)         | 6 (11.8%)   |
|                              | First visit with neurologist, lead the tests                 | 70 (16%)          | 11 (21.6%)  |
|                              | NA                                                           | 3 (0.7%)          | 2 (3.9%)    |
| Living in mountainous area   | No                                                           | 377 (86.1%)       | 42 (82.4%)  |
|                              | Yes                                                          | 59 (13.5%)        | 8 (15.7%)   |

|                      |                                    |             |            |
|----------------------|------------------------------------|-------------|------------|
|                      | NA                                 | 2 (0.5%)    | 1 (2%)     |
| Place of first visit | Private practice                   | 284 (64.8%) | 41 (80.4%) |
|                      | Hospital                           | 151 (34.5%) | 10 (19.6%) |
|                      | NA                                 | 3 (0.7%)    |            |
| First symptoms       | Gait p.                            | 127 (29%)   | 27 (52.9%) |
|                      | Visual p.                          | 165 (37.7%) | 7 (13.7%)  |
|                      | Bladder p.                         | 46 (10.5%)  | 7 (13.7%)  |
|                      | Balance p.                         | 120 (27.4%) | 15 (29.4%) |
|                      | Bowel p.                           | 30 (6.8%)   | 3 (5.9%)   |
|                      | Dizziness                          | 95 (21.7%)  | 10 (19.6%) |
|                      | Dysarthria                         | 27 (6.2%)   | 2 (3.9%)   |
|                      | Paresthesia                        | 270 (61.6%) | 24 (47.1%) |
|                      | Weakness                           | 120 (27.4%) | 22 (43.1%) |
|                      | Paralysis                          | 107 (24.4%) | 17 (33.3%) |
|                      | Fatigue                            | 145 (33.1%) | 19 (37.3%) |
|                      | Pain                               | 53 (12.1%)  | 6 (11.8%)  |
|                      | Spasticity                         | 32 (7.3%)   | 14 (27.5%) |
|                      | Sexual dysf.                       | 28 (6.4%)   | 6 (11.8%)  |
|                      | Memory p.                          | 38 (8.7%)   | 2 (3.9%)   |
|                      | Depression                         | 43 (9.8%)   | 4 (7.8%)   |
| Socioeconomic status | Medium                             | 172 (39.3%) | 20 (39.2%) |
|                      | Low                                | 14 (3.2%)   | 3 (5.9%)   |
|                      | High                               | 235 (53.7%) | 23 (45.1%) |
|                      | NA                                 | 17 (3.9%)   | 5 (9.8%)   |
| Education level      | Mandatory education/apprenticeship | 177 (40.4%) | 28 (54.9%) |
|                      | School leaving certificate         | 43 (9.8%)   | 1 (2%)     |
|                      | Higher professional education      | 73 (16.7%)  | 8 (15.7%)  |
|                      | University degree                  | 127 (29%)   | 13 (25.5%) |
|                      | NA                                 | 18 (4.1%)   | 1 (2%)     |
| Living situation     | With partner only                  | 160 (36.5%) | 30 (58.8%) |
|                      | With partner & children            | 165 (37.7%) | 12 (23.5%) |
|                      | Alone                              | 79 (18%)    | 7 (13.7%)  |
|                      | Other                              | 33 (7.5%)   | 2 (3.9%)   |

|                                 |                    |             |            |
|---------------------------------|--------------------|-------------|------------|
|                                 | NA                 | 1 (0.2%)    |            |
| Language region of Switzerland  | German             | 370 (84.5%) | 41 (80.4%) |
|                                 | French             | 49 (11.2%)  | 7 (13.7%)  |
|                                 | Italian            | 17 (3.9%)   | 2 (3.9%)   |
|                                 | NA                 | 2 (0.5%)    | 1 (2%)     |
| MS diagnosed in older relatives | Yes                | 43 (9.8%)   | 4 (7.8%)   |
|                                 | No                 | 374 (85.4%) | 43 (84.3%) |
|                                 | NA                 | 21 (4.8%)   | 4 (7.8%)   |
| Swiss citizenship               | Yes                | 410 (93.6%) | 45 (88.2%) |
|                                 | No                 | 28 (6.4%)   | 6 (11.8%)  |
| Typology of residence           | Urban              | 246 (56.2%) | 28 (54.9%) |
|                                 | Urban - Rural      | 123 (28.1%) | 11 (21.6%) |
|                                 | Rural              | 67 (15.3%)  | 11 (21.6%) |
|                                 | NA                 | 2 (0.5%)    | 1 (2%)     |
| Time contact-to-evaluation      | Within 1 month     | 312 (71.2%) | 17 (33.3%) |
|                                 | More than 1 month  | 126 (28.8%) | 34 (66.7%) |
| Time evaluation-to-diagnosis    | Within 6 months    | 353 (80.6%) | 31 (60.8%) |
|                                 | More than 6 months | 85 (19.4%)  | 20 (39.2%) |

p. = problems, dysf. = dysfunction

**Figure S3.** Logistic regression model on contact-to-evaluation time, restricted to the participants with RRMS start. (N = 469)

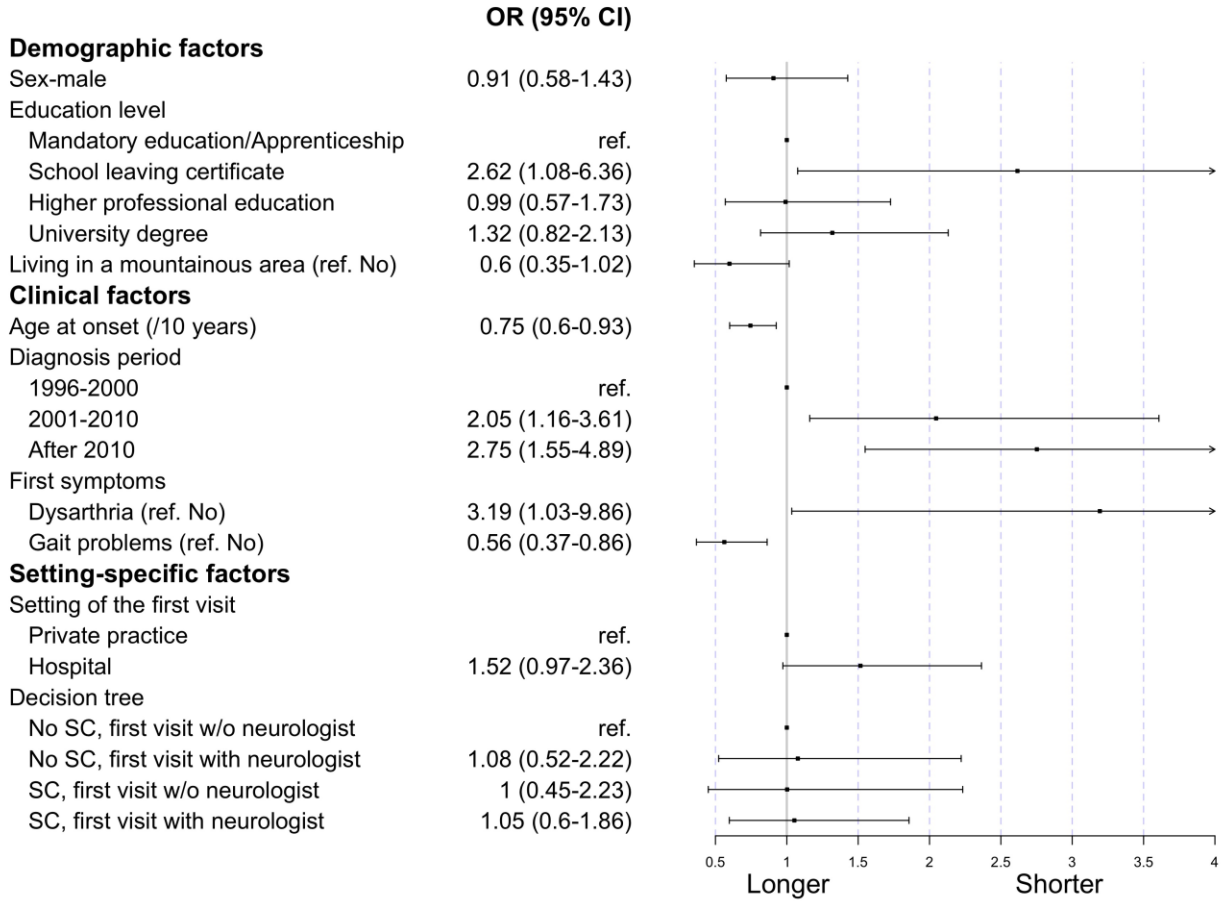

Supplement: MSJ823955_supplemental_material.pdf [file MSJ823955_supplemental_material.pdf]
